# Supplementary material for: A genome-wide RNAi screen identifies novel targets of neratinib resistance leading to identification of potential drug resistant genetic markers
Source: Royal Society of Chemistry journal article supplement (doi:10.1039/c2mb05512k), 2012-02-22

# Neatinib Pos Selex paper Figures

Seyhan et al., 2011 (Aug.8.2011)

# SUPPLEMENTAL FIGURES

Path Designer Network 3

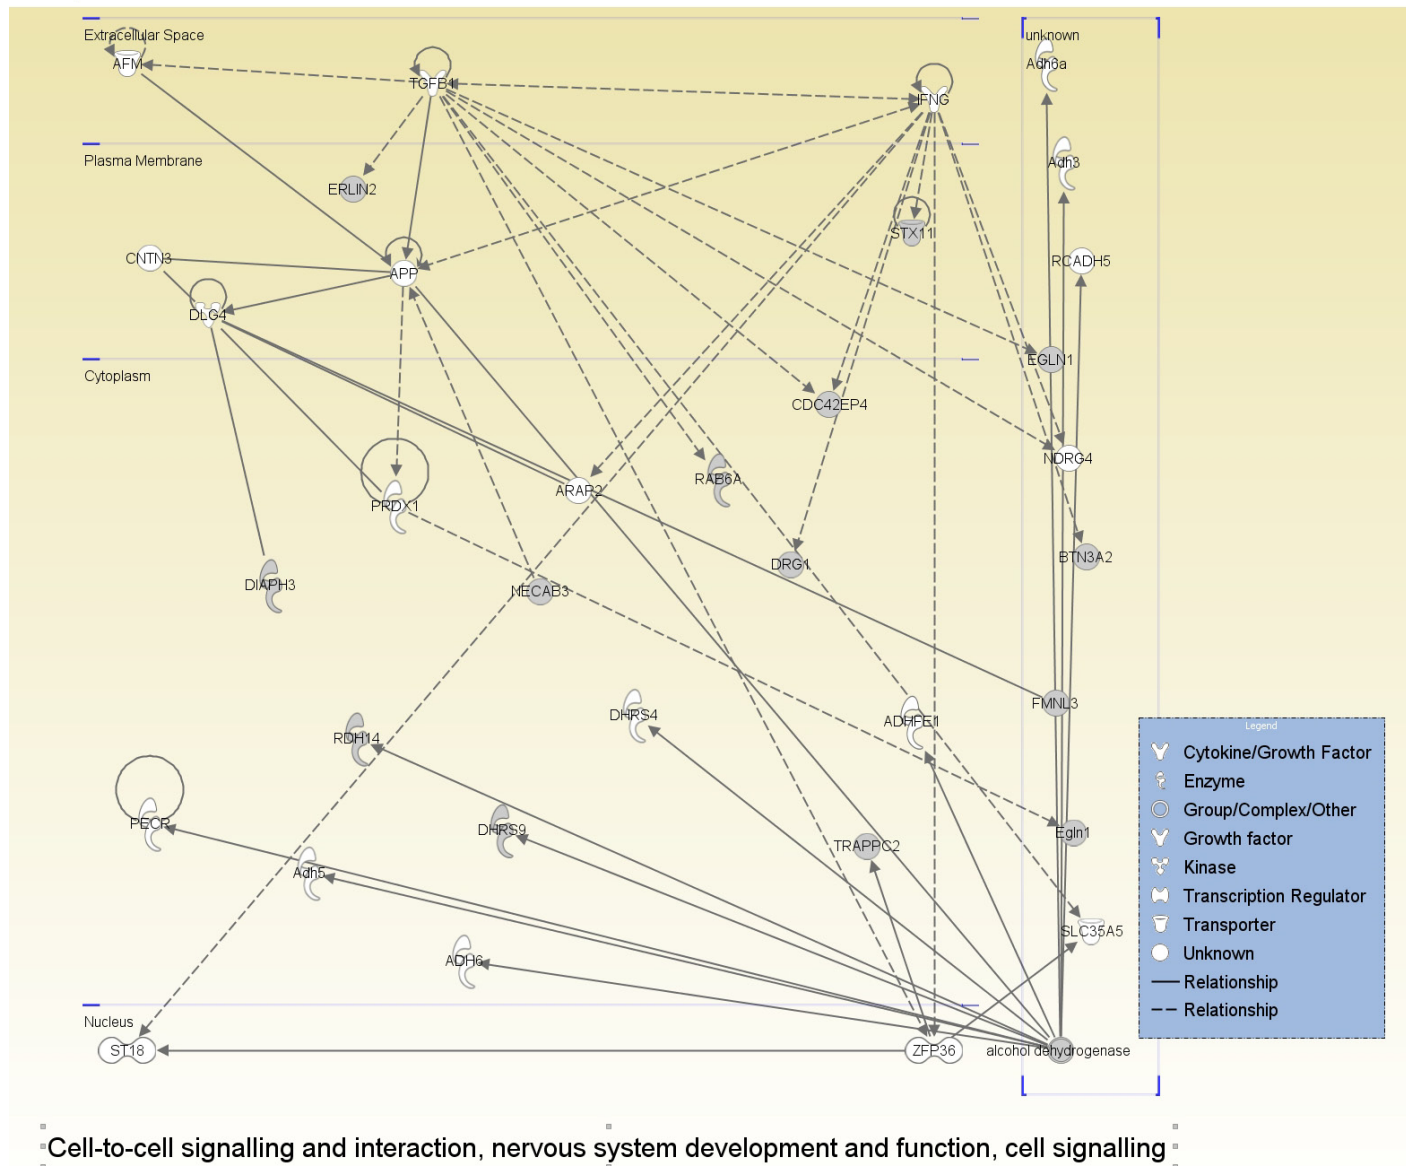

Path Designer Network 4

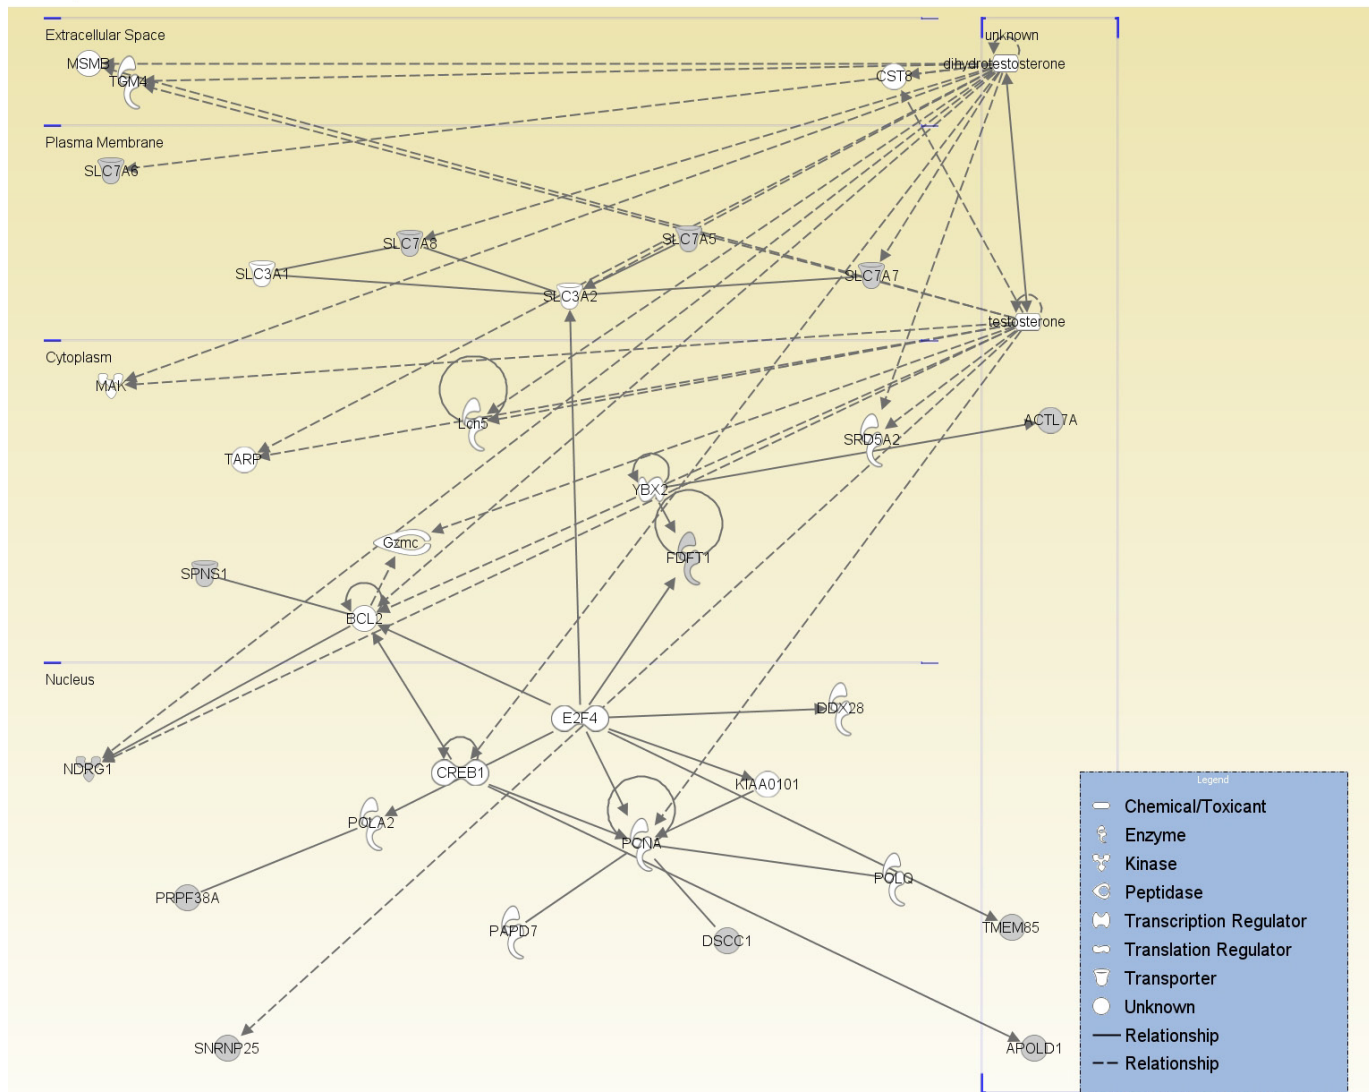

Amino acid metabolism, molecular transport, small molecule biochemistry

Path Designer Network 5

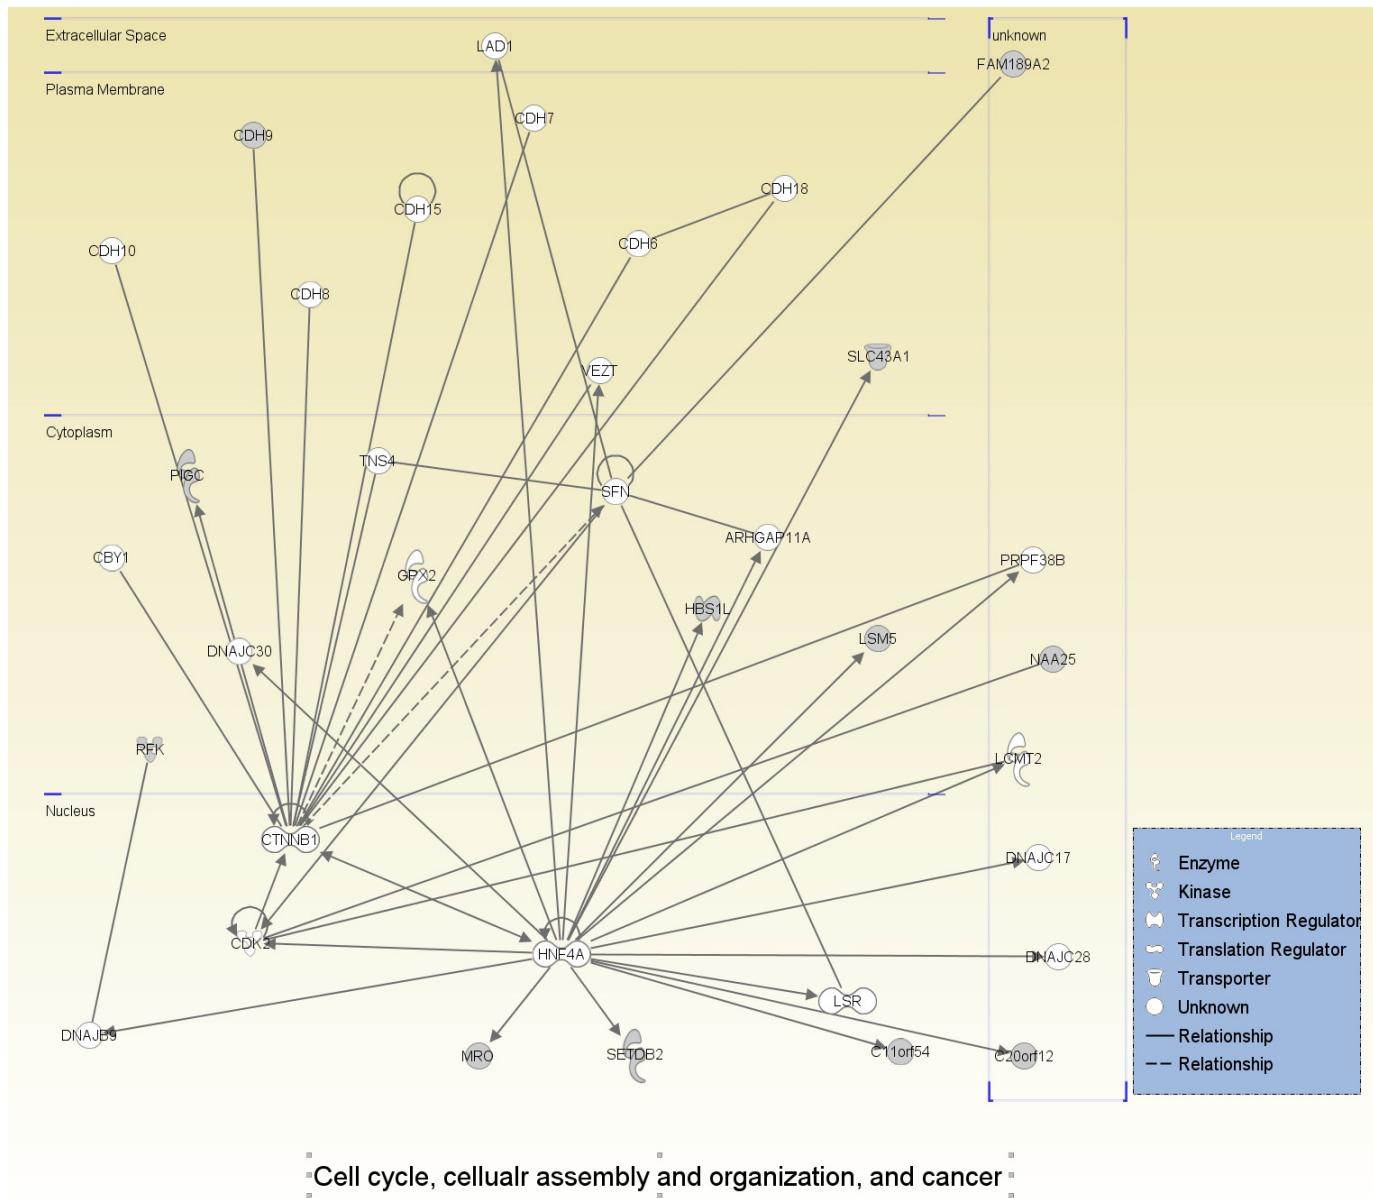

Path Designer Network 1

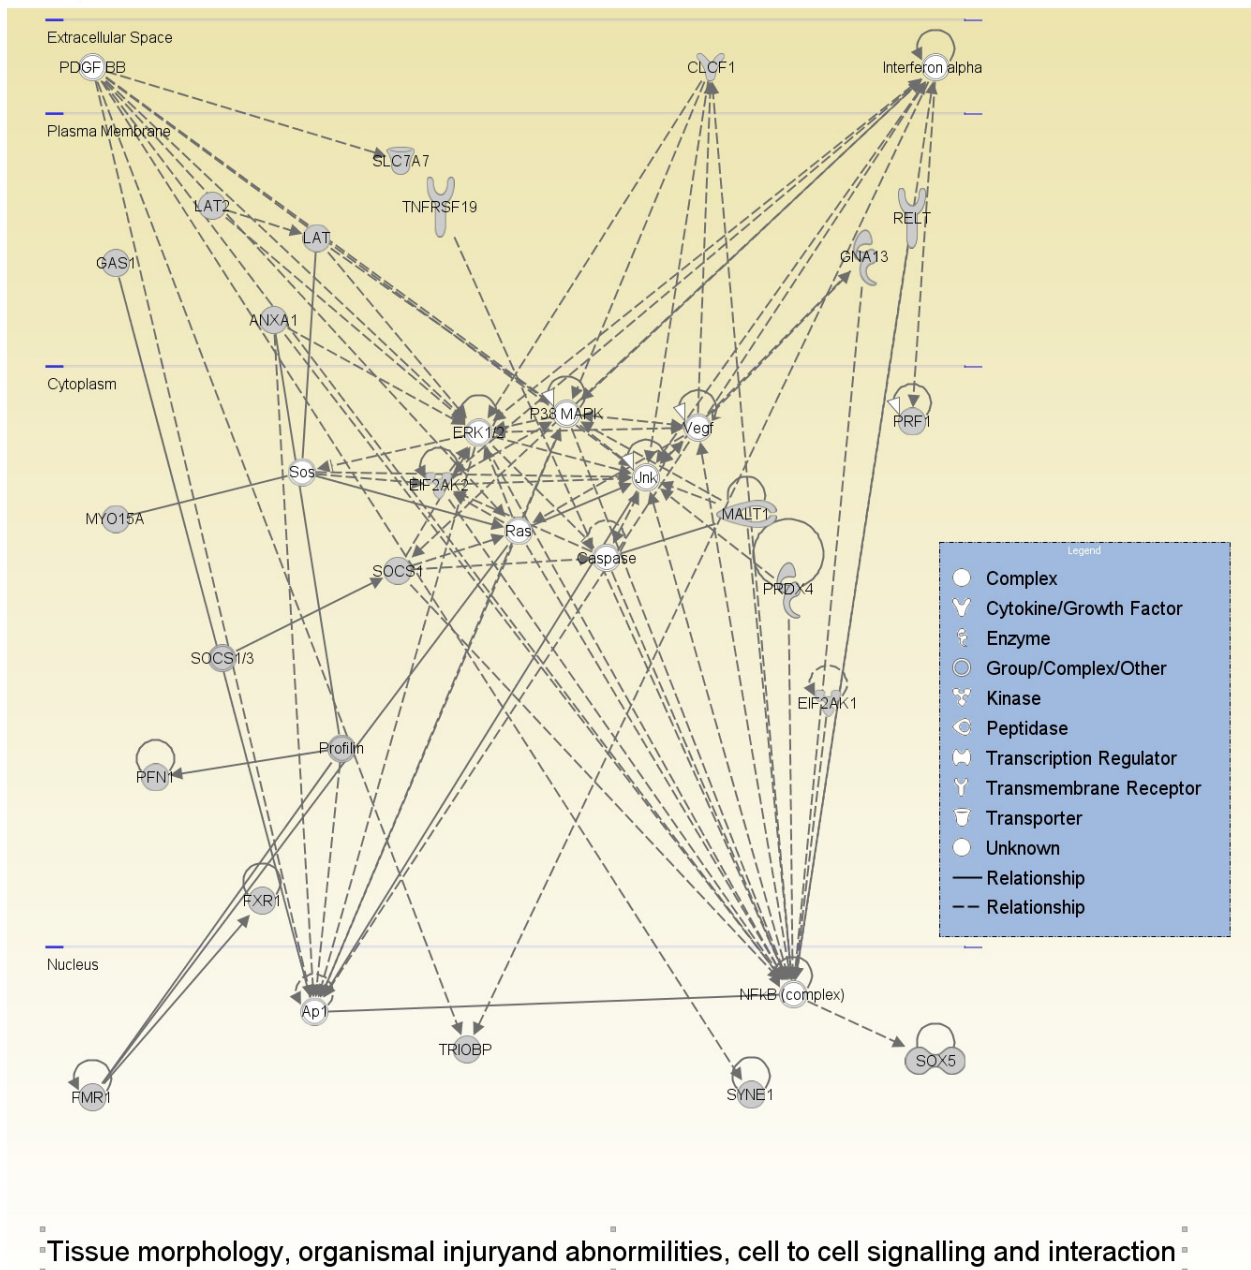

Tissue morphology, organismal injury and abnormalities, cell to cell signalling and interaction

Path Designer Network 2

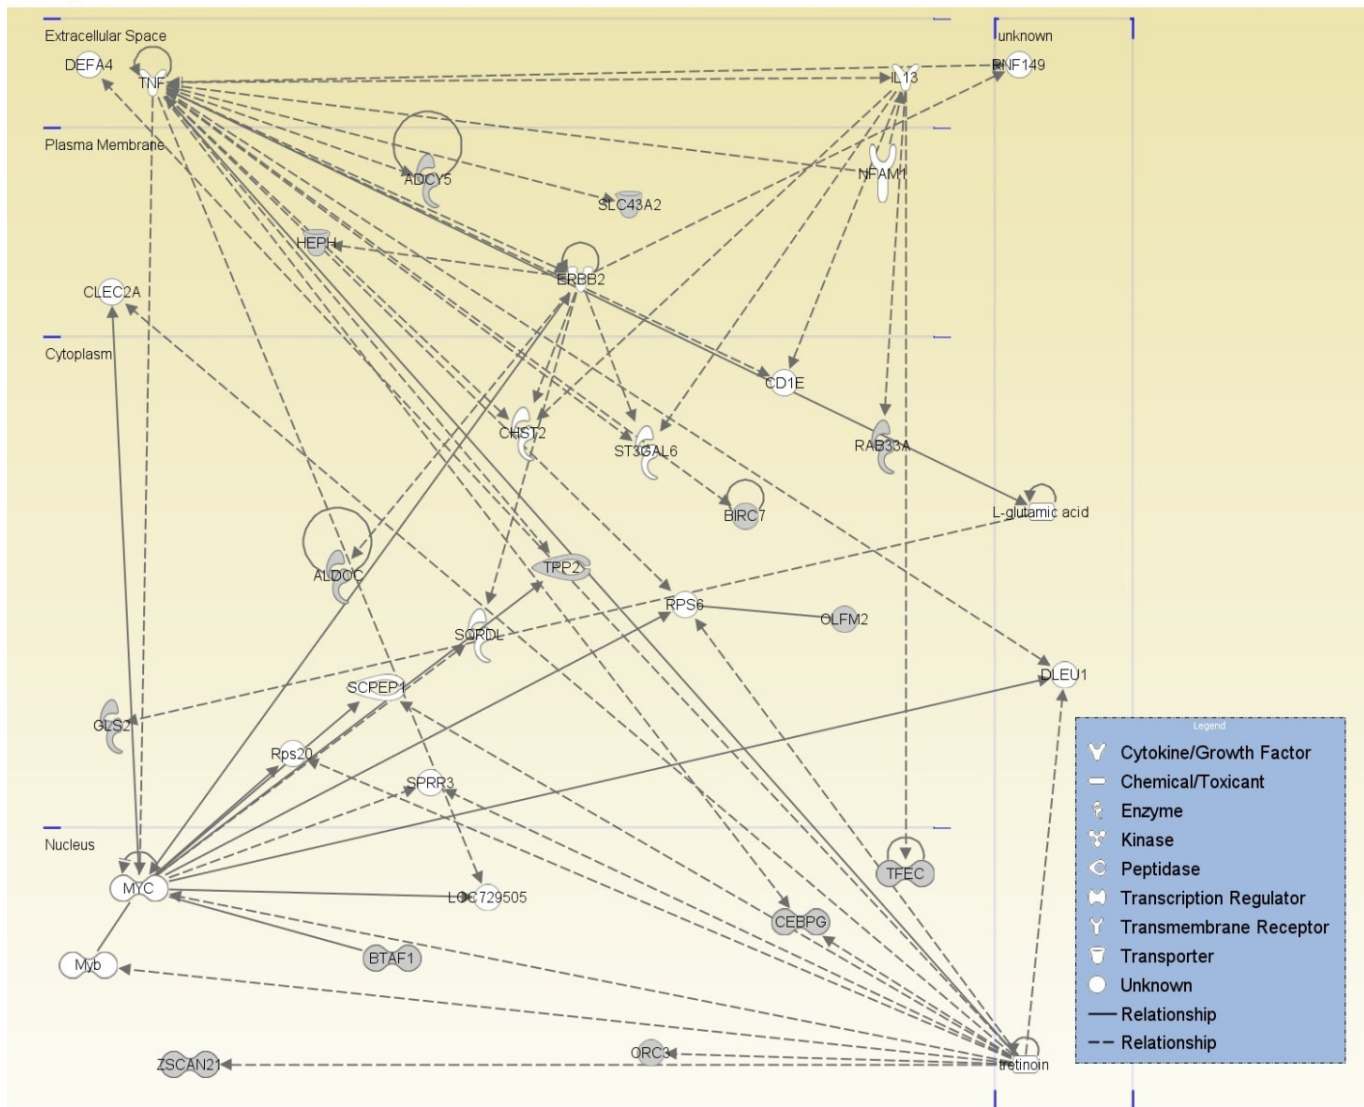

Supplement: c2mb05512k.pdf [file c2mb05512k.pdf]
